# Supplementary material
Source: publisher figshare collection journal article supplement (https://acs.figshare.com/ndownloader/files/8857288)
Supplement: Supplementary file 1 [file 8857288]

## Supporting Information

### Human Exonuclease 1 Threads 5'-Flap Substrates Through its Helical Arch

Steven J. Shaw, L. David Finger and Jane A. Grasby

#### Protein Expression and Purification

The N-terminal nuclease domain of wild type human Exonuclease 1 (Uniprot Q9UQ84, residues 1-352) was expressed and purified as described previously.<sup>1</sup>

#### Preparation of Substrates

The oligonucleotides (Table S1) were produced and HPLC purified by LGC Biosearch. Substrate constructs were first incubated at 95°C for 5 minutes in 50 mM HEPES, pH 7.5, and 100 mM KCl before cooling at room temperature to anneal.

#### Determination of Products of hEXO1-352

Product sizes were determined for hEXO1-352-catalyzed reactions of substrates EO and psY (150 nM, Table S1 and Figure S1) with 0.2 and 1 nM enzyme respectively in 25 mM HEPES, pH 7.5, 50 mM KCl, 8 mM MgCl<sub>2</sub>, 1 mM DTT, 0.1 mg/mL BSA at 37°C, by co-injection with oligonucleotide standards using a dHPLC equipped with a fluorescence detector (Wave system, Transgenomic, UK).

#### Trapping and Blocking of EXO1 with Streptavidin

Experiments were performed as described previously for hFEN1 (Uniprot P39748).<sup>2</sup> Pre-incubation for experiments that required it were carried out with 4 μM hEXO1-352 and 10 nM Bio-psY in the presence of 2 mM CaCl<sub>2</sub>. For the pre-mixed and the trapped experiment, EXO1 and the indicated substrate were pre-incubated at 20°C for two minutes before the addition of 1x reaction buffer (for the pre-mixed) or five equivalents of streptavidin (for the trapped) to a final concentration of 25 mM HEPES, pH 7.5, 50 mM KCl, 2 mM CaCl<sub>2</sub>, 1 mM DTT, 0.1 mg/mL BSA and 5% glycerol before being incubated for a further five minutes. In the case of the blocked experiment, substrate and five equivalents of streptavidin were first incubated at 20°C for five minutes in the same buffer before the addition of enzyme and followed by a further two-minute incubation. After the pre-incubation periods, the samples were heated to 37°C and reaction was initiated by mixing 1:1 with 25 mM HEPES, pH 7.5, 50 mM KCl, 16 mM MgCl<sub>2</sub>, 1 mM DTT, 0.1 mg/mL BSA and 5% glycerol, to a final concentration of 2 μM enzyme and 5 nM substrate. The reactions were sampled manually or using a RQF-63 quench flow device (Hi-Tech Sci Ltd., Salisbury, UK). Reactions were quenched 2:1 with 8 M urea containing 300 mM EDTA, pH 8. Potential formation of product during pre-incubation was excluded by analysing a sample prior to the addition of Mg<sup>2+</sup>. Samples were analysed by dHPLC equipped with a fluorescence detector (Wave system, Transgenomic, UK). Kinetic parameters rate ( $k$ ) and amplitude ( $A$ ) were determined by generalized non-linear least squares in Graphpad Prism using a single (equation 1) or double (equation 2) exponential model for product formation.

$$P_t = P_\infty(1 - e^{-kt}) \quad (1)$$

$$P_t = A_1P_A(1 - e^{-k_1t}) + A_2(100 - P_A)(1 - e^{-k_2t}) \quad (2)$$

Where product formation ( $P_t$ ) per unit time ( $t$ ) are the experimental values, and  $P_\infty$  is the amount of product at the end point.

#### Determining Whether the Portion of Fast Decay is Dependent on EXO1 Concentration

Trapping experiments were performed as above. Enzyme concentrations of 1, 2, 4 and 8 μM were pre-incubated in buffers containing Ca<sup>2+</sup> with 10 nM substrate. Samples were quenched in 8 M urea containing 300 mM EDTA at 15, 30, 60 and 120 seconds. A control time-point was taken before initiation with Mg<sup>2+</sup> buffer to determine if reaction occurred during pre-incubation. The samples were analysed by dHPLC with a fluorescence detector as above.

Table 1 Oligonucleotide Sequences and Constructs

Table S1: Oligonucleotides used herein.

| Oligo     | Sequence                                                     |
|-----------|--------------------------------------------------------------|
| 5'E1      | 5'-FAM-ACAAGGACTGCTCGACAC-3'                                 |
| 5'F1      | 5'-FAM-TTTTTACAAGGACTGCTCGACAC-3'                            |
| T1        | 5'-GTGTCGAGCAGTCCTTGTGACGAC-3'                               |
| Bio-psY   | 5'-FAM-BioTEG-GAACACACAGAACACACACCGCTTGCGGTGTGTGTTCCACAAC-3' |
| Construct | Oligo Combination                                            |
| EO        | 5'E1 + T1                                                    |
| psY       | 5'F1 + T1                                                    |

Sequences of individual oligonucleotides used. (FAM): 5'-fluorescein, (BioTEG): biotin.

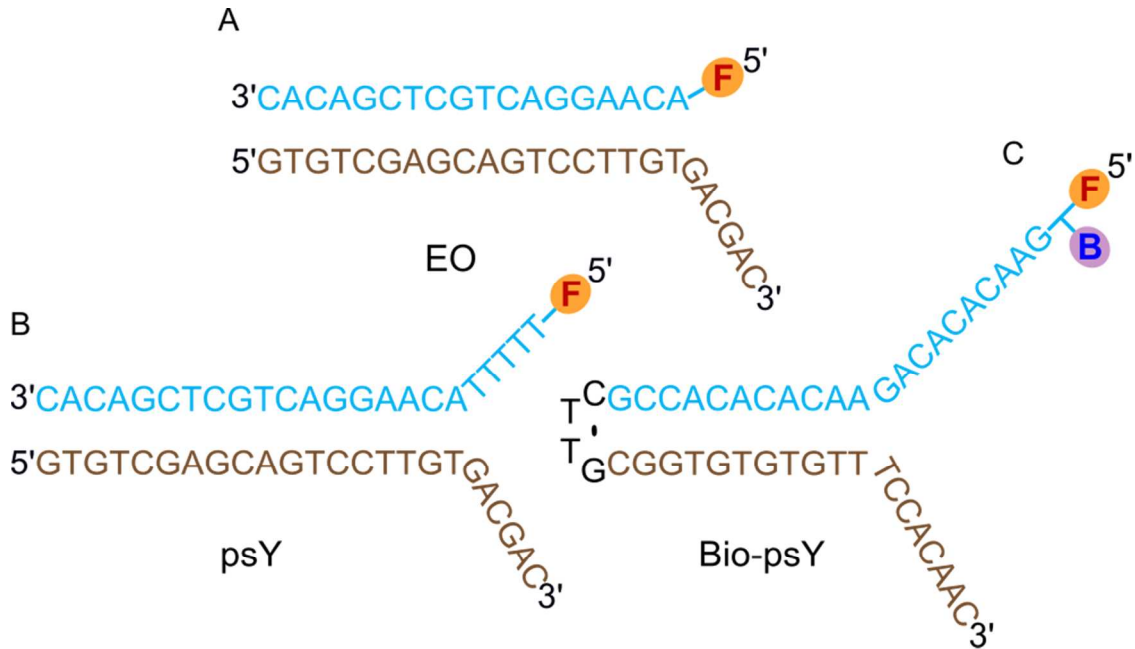

**Figure S1:** DNA constructs used. (A) 5' fluorescein labelled 3' overhang (EO). (B) 5' fluorescein labelled pseudo-Y substrate (psY). (C) Unimolecular 5' fluorescein biotin pseudo-Y (Bio-psY)

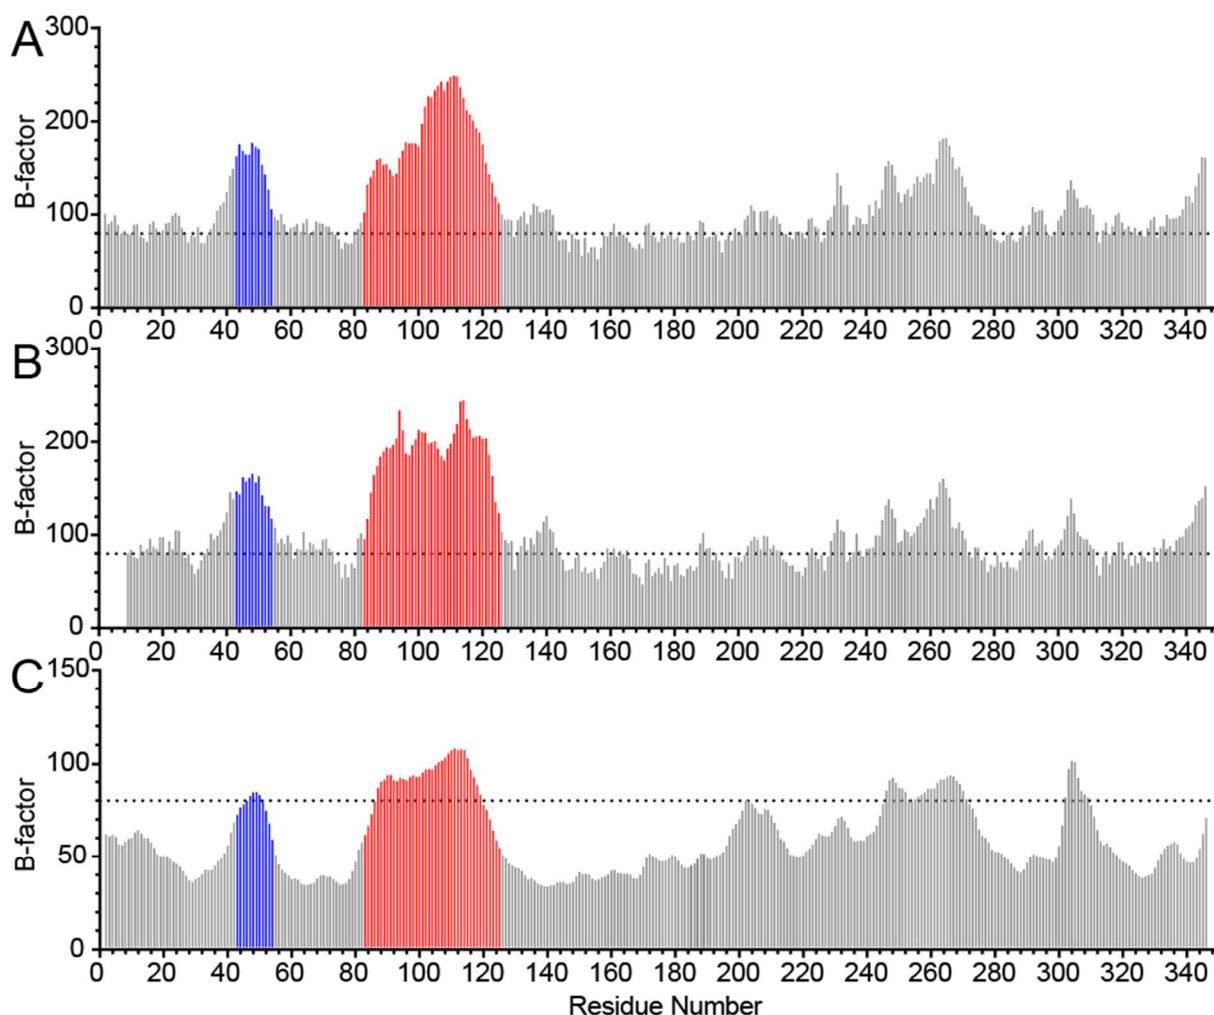

**Figure S2.** Plots of B-factors ( $\text{\AA}^2$ ) for main chain amide nitrogens versus residue number for three crystal structures of hEXO1-352 in complex with DNA show that  $\alpha 2$ - $\alpha 3$  loop (blue) and  $\alpha 4$ - $\alpha 5$  (red) have higher B-factors than most of the protein. B-factors were extracted from (A) 3QEA, (B) 3QEB and (C) 3QE9 using PDB editor. The dotted line indicates the B-factor value of  $80 \text{ \AA}^2$ , which is equivalent to a root mean square displacement of  $1 \text{ \AA}$ .

### Supplementary References

- (1) Exell, J. C., Thompson, M. J., Finger, L. D., Shaw, S. J., Debreczeni, J., Ward, T. A., McWhirter, C., Siöberg, C. L., Molina, D. M., Abbott, W. M. (2016) *Nat. Chem. Biol.* 12, 815-21.
- (2) Patel, N., Attack, J. M., Finger, L. D., Exell, J. C., Thompson, P., Tsutakawa, S., Tainer, J. A., Williams, D. M., Grasby, J. A. (2012) *Nucleic Acids Res.* 40, 4507-4519.
